# Supplementary material
Source: Springer Nature journal article supplement (https://www.springermedizin.de/resource/supplementary/12885_2011_3052_MOESM5_ESM.pdf/9462470)

**A**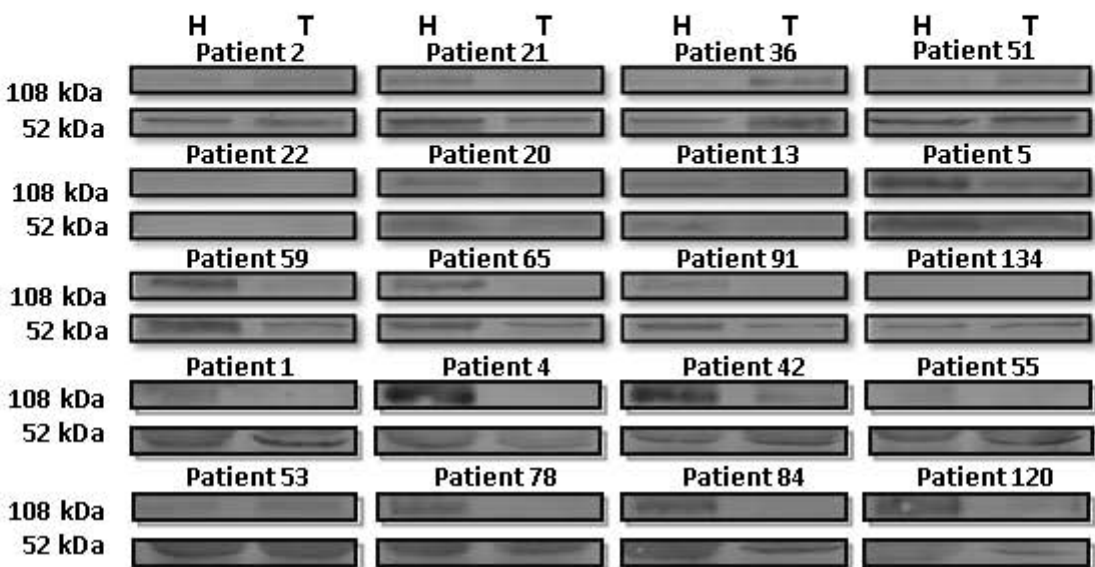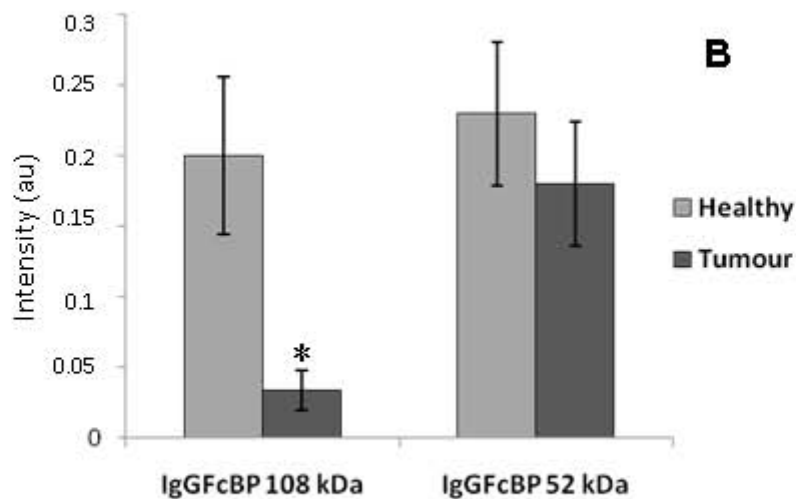

Supplement: MOESM5 [file 9462470]
